# Supplementary material for: Guided construction of single cell reference for human and mouse lung
Source: PubMed Central journal article supplement (PMC10387117; doi:10.1038/s41467-023-40173-5), 2023-07-29
Supplement: 41467_2023_40173_MOESM2_ESM.pdf [file 41467_2023_40173_MOESM2_ESM.pdf]

## **Description of additional supplementary files**

**Supplementary Data 1. Collection of single cell/single nucleus RNA-seq of human lung.**

**Supplementary Data 2. Cell type dictionary for the LungMAP Human Lung CellRef construction.** p: positive cell type marker. n: negative cell type marker.

**Supplementary Data 3. Sample information of Drop-seq of Mouse Lungs.**

**Supplementary Data 4. Cell type dictionary for the LungMAP Mouse Lung Development CellRef construction.** p: positive cell type marker. n: negative cell type marker.

**Supplementary Data 5. Cell type selective markers predicted by LungMAP Human Lung CellRef.** Please see method for cell selective marker prediction.

**Supplementary Data 6. Cell type selective markers predicted by LungMAP Mouse Lung CellRef.** Please see method for cell selective marker prediction.
